# Supplementary material
Source: PubMed Central journal article supplement (PMC4788596)
Supplement: NIHMS735963-supplement.pdf [file NIHMS735963-supplement.pdf]

**Sex and Diagnosis Specific Associations Between DNA Methylation of the Oxytocin Receptor Gene with Emotion Processing and Temporal-Limbic and Prefrontal Brain Volumes in Psychotic Disorders**

***Supplemental Information***

**Table S1. OXTR DNA methylation levels in individuals with psychotic disorders as a function of antipsychotics and anticonvulsant/mood stabilizers**

|                                | OXTR DNA Methylation |              |          |              | <i>p</i> -Value |
|--------------------------------|----------------------|--------------|----------|--------------|-----------------|
|                                | Yes                  |              | No       |              |                 |
|                                | <i>n</i>             | M (SD)       | <i>n</i> | M (SD)       |                 |
| Antipsychotics                 | 134                  | 47.57 (6.64) | 33       | 49.71 (7.57) | 0.10            |
| First generation               | 20                   | 46.81 (7.66) | 147      | 48.15 (6.76) | 0.41            |
| Second generation              | 120                  | 47.58 (6.58) | 47       | 49.04 (7.51) | 0.22            |
| Aripiprazole                   | 33                   | 49.37 (6.11) | 134      | 47.65 (7.01) | 0.20            |
| Clozapine                      | 2                    | 52.65 (0.99) | 165      | 47.94 (6.88) | 0.33            |
| Olanzapine                     | 11                   | 45.33 (5.61) | 156      | 48.18 (6.92) | 0.18            |
| Quetiapine                     | 20                   | 45.72 (5.65) | 147      | 48.30 (6.97) | 0.11            |
| Risperidone                    | 18                   | 48.11 (8.15) | 149      | 47.98 (6.72) | 0.94            |
| Ziprasidone                    | 10                   | 46.29 (6.77) | 157      | 48.10 (6.87) | 0.42            |
| Anticonvulsant/mood stabilizer | 86                   | 46.80 (7.63) | 81       | 49.26 (5.72) | 0.02            |
| Lithium                        | 24                   | 45.44 (6.66) | 143      | 48.42 (6.82) | 0.04            |
| Valproic acid                  | 26                   | 45.85 (7.67) | 141      | 48.39 (6.66) | 0.08            |

**Table S2. Regional brain volumes (mm<sup>3</sup>) in *a priori* regions of interest based on their relation to social cognition in women and men with and without psychotic disorders**

| Regions                                   | Sex            |                |                |                |                |                |                |                | <i>p</i> -Value |             |             |
|-------------------------------------------|----------------|----------------|----------------|----------------|----------------|----------------|----------------|----------------|-----------------|-------------|-------------|
|                                           | Women          |                |                |                | Men            |                |                |                |                 |             |             |
|                                           | Controls       | Scz            | SczA           | BP             | Controls       | Scz            | SczA           | BP             | Group           | Sex         | Group x Sex |
|                                           | M (SE)         |                 |             |             |
| <b>Left Hemisphere</b>                    |                |                |                |                |                |                |                |                |                 |             |             |
| <b><i>Temporal and Limbic Regions</i></b> |                |                |                |                |                |                |                |                |                 |             |             |
| Hippocampus                               | 4201<br>(62)   | 3837<br>(87)   | 4152<br>(96)   | 3987<br>(56)   | 4169<br>(64)   | 4064<br>(80)   | 3917<br>(96)   | 4199<br>(92)   | <b>0.008</b>    | 0.54        | <b>0.02</b> |
| Parahippocampal gyrus                     | 2369<br>(59)   | 2234<br>(83)   | 2151<br>(92)   | 2309<br>(54)   | 2322<br>(62)   | 2182<br>(77)   | 2233<br>(92)   | 2148<br>(88)   | 0.07            | 0.51        | 0.53        |
| Fusiform gyrus                            | 10386<br>(214) | 10256<br>(300) | 10009<br>(332) | 10552<br>(195) | 10576<br>(223) | 10512<br>(276) | 9918<br>(333)  | 11153<br>(318) | <b>0.03</b>     | 0.33        | 0.68        |
| Middle temporal gyrus                     | 11114<br>(226) | 11084<br>(317) | 10738<br>(351) | 10830<br>(206) | 11178<br>(235) | 11286<br>(291) | 9686<br>(351)  | 11214<br>(336) | <b>0.009</b>    | 0.70        | 0.12        |
| Amygdala                                  | 1579<br>(34)   | 1469<br>(48)   | 1543<br>(53)   | 1527<br>(31)   | 1587<br>(36)   | 1649<br>(44)   | 1621<br>(53)   | 1573<br>(51)   | 0.79            | <b>0.04</b> | 0.17        |
| Insula                                    | 6369<br>(104)  | 6170<br>(146)  | 6351<br>(162)  | 6278<br>(95)   | 6522<br>(108)  | 6428<br>(134)  | 6429<br>(162)  | 6627<br>(155)  | 0.59            | 0.08        | 0.76        |
| <b><i>Prefrontal Cortex</i></b>           |                |                |                |                |                |                |                |                |                 |             |             |
| Superior frontal gyrus                    | 22908<br>(352) | 21378<br>(492) | 21039<br>(545) | 22406<br>(320) | 22343<br>(365) | 21743<br>(453) | 21461<br>(546) | 23004<br>(522) | <b>0.001</b>    | 0.61        | 0.39        |
| Middle frontal gyrus                      | 22890<br>(437) | 22051<br>(612) | 20731<br>(677) | 22309<br>(398) | 23355<br>(454) | 22763<br>(563) | 21118<br>(678) | 23383<br>(648) | <b>0.001</b>    | 0.19        | 0.92        |
| Inferior frontal gyrus                    | 10925<br>(210) | 10169<br>(295) | 10520<br>(326) | 10624<br>(191) | 10797<br>(219) | 10638<br>(271) | 10188<br>(327) | 11096<br>(312) | 0.09            | 0.62        | 0.32        |
| Orbital frontal cortex                    | 13413<br>(184) | 12976<br>(258) | 12571<br>(285) | 12982<br>(168) | 13330<br>(191) | 13133<br>(237) | 13297<br>(286) | 13587<br>(273) | 0.20            | 0.09        | 0.20        |

| Regions                            | Sex            |                |                |                |                |                |                |                | p-Value      |             |             |
|------------------------------------|----------------|----------------|----------------|----------------|----------------|----------------|----------------|----------------|--------------|-------------|-------------|
|                                    | Women          |                |                |                | Men            |                |                |                |              |             |             |
|                                    | Controls       | Scz            | SczA           | BP             | Controls       | Scz            | SczA           | BP             | Group        | Sex         | Group x Sex |
| M (SE)                             | M (SE)         | M (SE)         | M (SE)         | M (SE)         | M (SE)         | M (SE)         | M (SE)         |                |              |             |             |
| <b>Right Hemisphere</b>            |                |                |                |                |                |                |                |                |              |             |             |
| <b>Temporal and Limbic Regions</b> |                |                |                |                |                |                |                |                |              |             |             |
| Hippocampus                        | 4270<br>(62)   | 3914<br>(88)   | 4199<br>(97)   | 4072<br>(57)   | 4264<br>(65)   | 4053<br>(81)   | 4055<br>(97)   | 4222<br>(93)   | <b>0.001</b> | 0.63        | 0.27        |
| Parahippocampal gyrus              | 2183<br>(49)   | 2015<br>(69)   | 2123<br>(76)   | 2081<br>(45)   | 2179<br>(51)   | 2163<br>(63)   | 1989<br>(76)   | 2080<br>(73)   | 0.10         | 0.97        | 0.23        |
| Fusiform gyrus                     | 9771<br>(185)  | 9662<br>(259)  | 9237<br>(287)  | 9782<br>(168)  | 10224<br>(192) | 9754<br>(238)  | 9342<br>(287)  | 10887<br>(274) | <b>0.001</b> | <b>0.04</b> | 0.09        |
| Middle temporal gyrus              | 12405<br>(244) | 11982<br>(341) | 12292<br>(378) | 12239<br>(222) | 12820<br>(253) | 12324<br>(314) | 11463<br>(378) | 12804<br>(361) | 0.07         | 0.65        | 0.17        |
| Amygdala                           | 1706<br>(39)   | 1637<br>(54)   | 1692<br>(60)   | 1664<br>(35)   | 1710<br>(40)   | 1721<br>(50)   | 1721<br>(60)   | 1698<br>(57)   | 0.86         | 0.39        | 0.84        |
| Insula                             | 6588<br>(114)  | 6445<br>(160)  | 6391<br>(177)  | 6412<br>(104)  | 6723<br>(119)  | 6763<br>(147)  | 6483<br>(178)  | 6445<br>(170)  | 0.20         | 0.27        | 0.77        |
| <b>Prefrontal Cortex</b>           |                |                |                |                |                |                |                |                |              |             |             |
| Superior frontal gyrus             | 21706<br>(345) | 20677<br>(483) | 21580<br>(314) | 20315<br>(534) | 22047<br>(358) | 20606<br>(444) | 22814<br>(512) | 20917<br>(535) | <b>0.001</b> | 0.18        | 0.45        |
| Middle frontal gyrus               | 23688<br>(427) | 22568<br>(598) | 21419<br>(662) | 22820<br>(389) | 23470<br>(444) | 22963<br>(550) | 21316<br>(663) | 23496<br>(634) | <b>0.001</b> | 0.70        | 0.77        |
| Inferior frontal gyrus             | 11359<br>(193) | 10422<br>(271) | 10927<br>(299) | 10956<br>(176) | 11288<br>(201) | 10952<br>(249) | 10647<br>(300) | 11670<br>(287) | <b>0.007</b> | 0.31        | 0.13        |
| Orbital frontal cortex             | 13174<br>(201) | 13009<br>(282) | 13010<br>(312) | 13087<br>(183) | 13509<br>(209) | 12956<br>(259) | 13162<br>(312) | 13621<br>(299) | 0.33         | 0.29        | 0.66        |

L, left; R, right; Scz, schizophrenia; SczA, schizoaffective; BP, psychotic bipolar.

All analyses adjusted for age, race, and total intracranial volume.

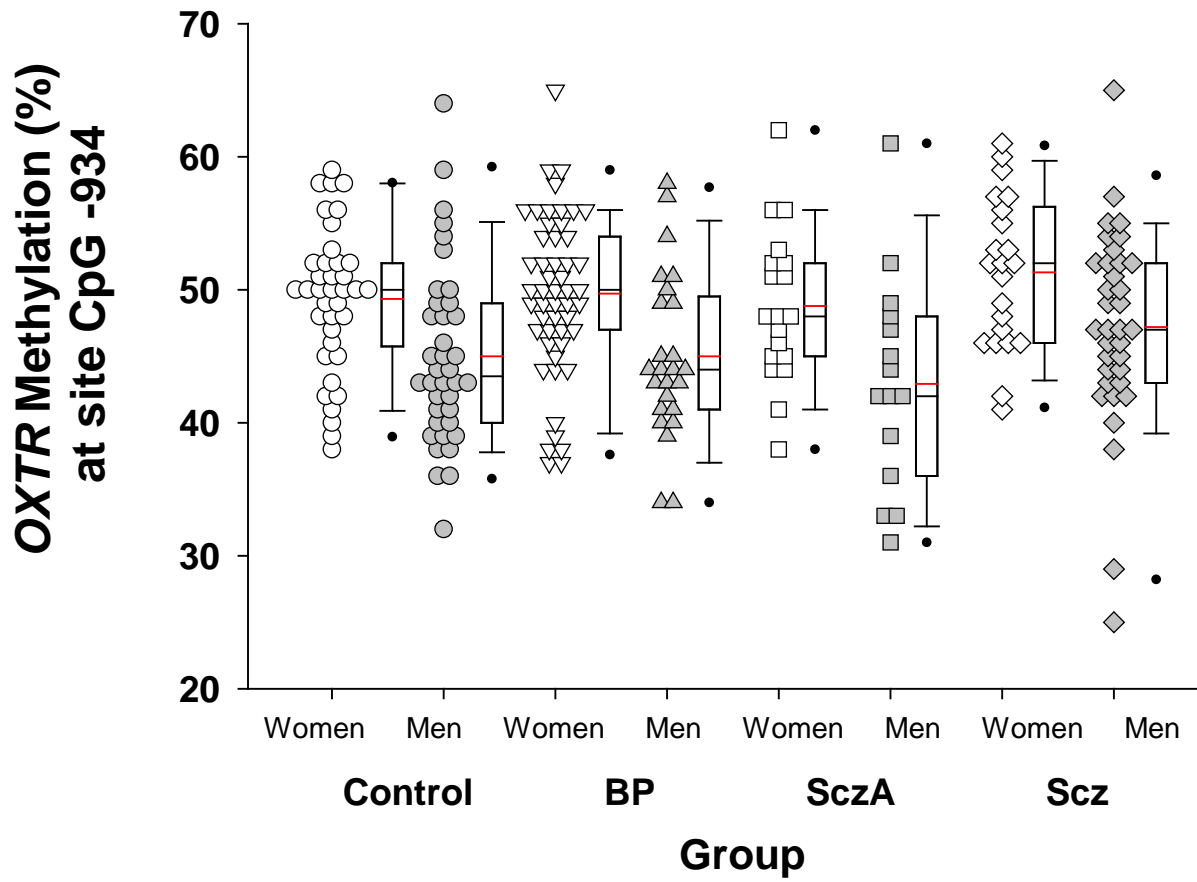

Figure S1. Raw *OXTR* DNA methylation levels as a function of group and sex. Scz, schizophrenia; SczA, schizoaffective; BP, psychotic bipolar. Red line is the mean.

**Table S3. Partial correlations between OXTR DNA methylation and peripheral oxytocin levels in women and men with and without psychotic disorders**

| Group           | Sex               |                    |
|-----------------|-------------------|--------------------|
|                 | Women<br><i>r</i> | Men<br><i>r</i>    |
| Controls        | -0.17             | -0.35 <sup>T</sup> |
| Patients        | 0.23*             | -0.24*             |
| Schizophrenia   | 0.37              | -0.27              |
| Schizoaffective | -0.09             | -0.50 <sup>T</sup> |
| Bipolar         | 0.26 <sup>T</sup> | -0.14              |

\*\* $p < 0.01$ ; \* $p < 0.05$ ; <sup>T</sup> $p > 0.05$  and  $p < 0.10$ .

Adjusted for age and race.

**Table S4.** Partial correlations ( $r$ ) between peripheral oxytocin and regional brain volumes in women and men with and without psychotic disorders for *a priori* regions of interest based on their relation to social cognition

| Region                             | OT Levels                |                     |                      |                    |                          |                     |                      |                    |
|------------------------------------|--------------------------|---------------------|----------------------|--------------------|--------------------------|---------------------|----------------------|--------------------|
|                                    | Women                    |                     |                      |                    | Men                      |                     |                      |                    |
|                                    | Controls<br>( $n = 35$ ) | Scz<br>( $n = 17$ ) | SczA<br>( $n = 13$ ) | BP<br>( $n = 41$ ) | Controls<br>( $n = 33$ ) | Scz<br>( $n = 22$ ) | SczA<br>( $n = 13$ ) | BP<br>( $n = 16$ ) |
| <b>Left Hemisphere</b>             |                          |                     |                      |                    |                          |                     |                      |                    |
| <i>Temporal and Limbic Regions</i> |                          |                     |                      |                    |                          |                     |                      |                    |
| Hippocampus                        | <b>0.40*</b>             | -0.02               | 0.33                 | <b>0.38*</b>       | -0.14                    | -0.31               | -0.50                | -0.10              |
| Parahippocampal gyrus              | -0.04                    | 0.04                | -0.32                | 0.21               | <b>-0.44*</b>            | 0.32                | -0.44                | 0.11               |
| Fusiform gyrus                     | -0.24                    | 0.39                | 0.40                 | -0.04              | -0.07                    | 0.09                | -0.16                | -0.36              |
| Middle temporal gyrus              | -0.28                    | 0.32                | -0.28                | -0.17              | -0.13                    | -0.14               | -0.36                | 0.47               |
| Amygdala                           | 0.17                     | 0.11                | 0.11                 | 0.05               | -0.08                    | -0.12               | 0.31                 | 0.20               |
| Insula                             | -0.21                    | 0.19                | 0.25                 | -0.07              | -0.11                    | -0.17               | <b>-0.68*</b>        | -0.19              |
| <i>Prefrontal Cortex</i>           |                          |                     |                      |                    |                          |                     |                      |                    |
| Superior frontal gyrus             | -0.04                    | 0.16                | 0.49                 | -0.14              | 0.14                     | -0.07               | 0.05                 | 0.42               |
| Middle frontal gyrus               | -0.18                    | 0.35                | -0.03                | -0.22              | -0.26                    | -0.08               | 0.35                 | 0.23               |
| Inferior frontal gyrus             | 0.06                     | -0.07               | 0.55                 | -0.14              | -0.18                    | -0.08               | -0.31                | 0.38               |
| Orbital frontal cortex             | 0.16                     | 0.21                | -0.09                | -0.07              | -0.16                    | 0.19                | -0.39                | 0.39               |
| <b>Right Hemisphere</b>            |                          |                     |                      |                    |                          |                     |                      |                    |
| <i>Temporal and Limbic Regions</i> |                          |                     |                      |                    |                          |                     |                      |                    |
| Hippocampus                        | 0.19                     | 0.07                | 0.25                 | <b>0.40*</b>       | 0.07                     | -0.17               | -0.43                | -0.49              |
| Parahippocampal gyrus              | 0.04                     | -0.34               | 0.13                 | 0.21               | <b>-0.44*</b>            | 0.31                | 0.32                 | 0.11               |
| Fusiform gyrus                     | <b>-0.51*</b>            | <b>0.57*</b>        | <b>0.73*</b>         | -0.28 <sup>T</sup> | -0.12                    | -0.12               | 0.18                 | 0.03               |

| Region                          | OT Levels            |                 |                  |                    |                      |                 |                  |                |
|---------------------------------|----------------------|-----------------|------------------|--------------------|----------------------|-----------------|------------------|----------------|
|                                 | Women                |                 |                  |                    | Men                  |                 |                  |                |
|                                 | Controls<br>(n = 35) | Scz<br>(n = 17) | SczA<br>(n = 13) | BP<br>(n = 41)     | Controls<br>(n = 33) | Scz<br>(n = 22) | SczA<br>(n = 13) | BP<br>(n = 16) |
| Middle temporal gyrus           | -0.17                | 0.36            | 0.04             | -0.01              | -0.13                | 0.02            | <b>-0.70*</b>    | 0.01           |
| Amygdala                        | -0.12                | 0.12            | -0.06            | 0.09               | 0.11                 | -0.21           | 0.13             | -0.33          |
| Insula                          | -0.01                | 0.37            | <b>0.67*</b>     | -0.11              | -0.05                | -0.17           | -0.47            | 0.09           |
| <b><i>Prefrontal Cortex</i></b> |                      |                 |                  |                    |                      |                 |                  |                |
| Superior frontal gyrus          | 0.04                 | 0.18            | 0.02             | -0.11              | -0.20                | -0.04           | -0.04            | 0.49           |
| Middle frontal gyrus            | 0.01                 | 0.30            | <b>0.77*</b>     | -0.22              | -0.13                | -0.18           | 0.05             | 0.12           |
| Inferior frontal gyrus          | -0.02                | 0.26            | 0.22             | -0.22              | -0.01                | 0.01            | 0.04             | 0.41           |
| Orbital frontal cortex          | 0.13                 | 0.11            | 0.06             | -0.28 <sup>T</sup> | -0.19                | 0.12            | -0.49            | 0.29           |

\*\* $p < 0.01$ ; \* $p < 0.05$ ; <sup>T</sup> $p > 0.05$  and  $p \leq 0.09$ .

Scz, schizophrenia; SczA, schizoaffective; BP, psychotic bipolar.

Adjusted for age, race, and total intracranial volume. In multivariable regression analyses, in women, the association between peripheral OT levels and brain regions differed by group, with significant peripheral OT level x group interactions in some brain regions. Specifically, an OT level x group interaction was observed in the right fusiform gyrus ( $p = 0.004$ ). This interaction was driven by effects in all patient groups, with the exception of females with schizophrenia. Higher peripheral levels of OT were associated with smaller volumes in the right fusiform gyrus in healthy controls ( $\beta = -0.36$ ,  $p = 0.004$ ) and females with schizoaffective ( $\beta = 0.66$ ,  $p = 0.01$ ) and psychotic bipolar disorder [trend,  $\beta = -0.23$ ,  $p = 0.06$ ]. In men, an OT levels x group interaction was significant in the right parahippocampal gyrus ( $p = 0.01$ ) with a similar trend in the left parahippocampal gyrus ( $p = 0.06$ ). These associations were driven primarily by the male controls in whom higher levels of OT were associated with smaller volumes in the right ( $\beta = -0.51$ ,  $p = 0.004$ ) and left parahippocampal gyri ( $\beta = -0.54$ ,  $p = 0.002$ ).
